# Supplementary material
Source: PubMed Central journal article supplement (PMC5083246)

# Graphic Abstract

Presence of B cell

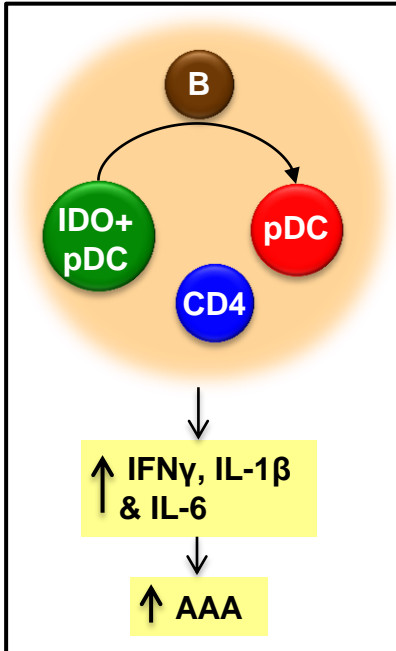

Absence of B cell

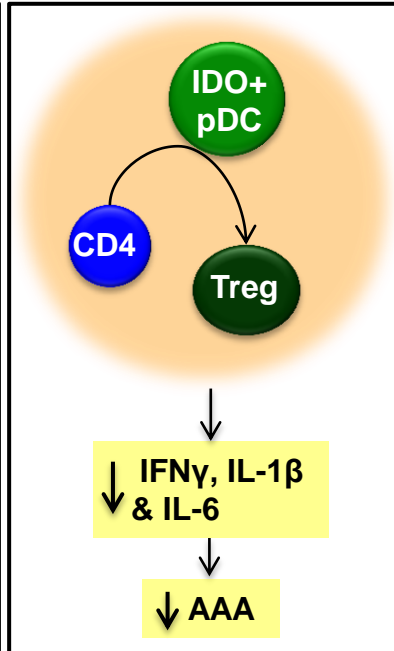

Supplement: NIHMS814698-supplement-Graphic_Abstract_B_cell_depletion_and_AAA_ATVB.pdf [file NIHMS814698-supplement-Graphic_Abstract_B_cell_depletion_and_AAA_ATVB.pdf]
